# Supplementary material for: The Evaluation and Key-Factor Identification of the Influence of Tourism on the Soil of Mount Tai
Source: MDPI journal article supplement (doi:10.3390/su142113929), 2022-10-26
Supplement: s1 [file sustainability-1972968-supplementary.pdf › sustainability-1972968-supplementary.pdf]

*Supplementary Material*

# **The Evaluation and Key-Factor Identification of the Influence of Tourism on the Soil of Mount Tai**

**Fang Li <sup>1</sup>, Kailai Wang <sup>2</sup>, Xin Li <sup>1</sup>, Haodong Zhang <sup>1</sup> and Ying Li <sup>1,\*</sup>**

<sup>1</sup> College of Economics and Management, Shandong Agricultural University, Tai'an, 271018, China

<sup>2</sup> China National Administration of Coal Geology, Beijing, 100038, China

\* Correspondence: i\_ying@sdaa.edu.cn

**Table S1. Tests of Normality (Shapiro-Wilk)**

|          | Statistic |         | Sig.    |         |
|----------|-----------|---------|---------|---------|
|          | Group A   | Group B | Group A | Group B |
| AWCD     | .941      | .953    | .565    | .698    |
| Shannon  | .874      | .967    | .112    | .857    |
| McIntosh | .957      | .895    | .749    | .191    |
| Simpson  | .911      | .933    | .291    | .475    |
| Hg       | .684      | .711    | .001    | .001    |
| As       | .849      | .808    | .057    | .018    |
| Pb       | .745      | .857    | .003    | .071    |
| Cd       | .916      | .909    | .323    | .278    |
| Cu       | .946      | .906    | .619    | .254    |
| Cr       | .893      | .857    | .184    | .071    |
| pH       | .960      | .864    | .784    | .084    |
| EC       | .955      | .892    | .722    | .180    |
| AK       | .938      | .923    | .532    | .379    |
| OM       | .936      | .874    | .511    | .111    |
| AN       | .836      | .901    | .039    | .227    |
| AP       | .818      | .955    | .024    | .733    |
| TN       | .923      | .952    | .379    | .693    |

**Table S2.** Standard deviation of soil physicochemical properties

| Sites | pH    | EC     | OM     | AN    | AP     | AK    | TN    |
|-------|-------|--------|--------|-------|--------|-------|-------|
| A1    | 0.364 | 12.818 | 20.612 | 1.344 | 1.022  | 6.248 | 0.027 |
| A2    | 0.118 | 7.568  | 6.681  | 0.501 | 9.779  | 2.185 | 0.087 |
| A3    | 0.051 | 7.386  | 12.635 | 1.136 | 8.382  | 3.978 | 0.232 |
| A4    | 0.039 | 0.830  | 15.611 | 0.029 | 4.412  | 2.424 | 0.085 |
| A5    | 0.478 | 6.469  | 17.408 | 0.407 | 9.301  | 1.795 | 0.139 |
| A6    | 0.280 | 7.722  | 9.758  | 0.072 | 15.659 | 3.505 | 0.249 |
| A7    | 0.364 | 13.956 | 14.973 | 0.368 | 7.401  | 4.471 | 0.158 |
| A8    | 0.309 | 8.276  | 1.935  | 0.219 | 8.166  | 1.506 | 0.153 |
| A9    | 0.401 | 4.635  | 17.676 | 0.060 | 10.029 | 2.176 | 0.176 |
| A10   | 0.267 | 3.510  | 9.782  | 0.057 | 18.591 | 7.606 | 0.087 |
| B1    | 0.434 | 4.862  | 2.672  | 0.330 | 12.978 | 2.461 | 0.045 |
| B2    | 0.102 | 11.229 | 3.061  | 0.961 | 6.938  | 1.993 | 0.106 |
| B3    | 0.197 | 14.150 | 14.738 | 1.158 | 10.440 | 0.960 | 0.038 |
| B4    | 0.248 | 4.911  | 16.499 | 1.428 | 12.424 | 4.968 | 0.040 |
| B5    | 0.195 | 2.551  | 0.029  | 1.166 | 9.151  | 1.014 | 0.063 |
| B6    | 0.050 | 9.900  | 13.441 | 1.416 | 10.705 | 1.812 | 0.085 |
| B7    | 0.236 | 4.986  | 12.111 | 0.762 | 13.141 | 4.377 | 0.104 |
| B8    | 0.266 | 14.768 | 43.022 | 0.237 | 12.000 | 5.224 | 0.221 |
| B9    | 0.217 | 8.675  | 54.934 | 0.940 | 15.477 | 2.023 | 0.142 |
| B10   | 0.304 | 10.073 | 24.362 | 0.119 | 18.122 | 0.530 | 0.137 |

**Table S3. Heavy metal concentrations**

|             | Hg(mg/kg<br>) | As(mg/kg<br>) | Pb(mg/kg<br>) | Cd(mg/kg<br>) | Cu(mg/kg<br>) | Cr(mg/kg<br>) |
|-------------|---------------|---------------|---------------|---------------|---------------|---------------|
| A1          | 0.04          | 9.53          | 29.40         | 0.22          | 18.21         | 53.40         |
| A2          | 0.09          | 6.84          | 30.19         | 0.22          | 24.62         | 49.77         |
| A3          | 0.14          | 6.26          | 31.61         | 0.28          | 25.68         | 49.48         |
| A4          | 0.08          | 6.84          | 31.42         | 0.22          | 28.79         | 51.65         |
| A5          | 0.15          | 6.93          | 29.78         | 0.36          | 26.31         | 46.38         |
| A6          | 0.20          | 7.28          | 71.38         | 0.53          | 36.51         | 52.46         |
| A7          | 0.16          | 7.40          | 34.52         | 0.38          | 42.39         | 61.06         |
| A8          | 1.53          | 11.2          | 46.61         | 0.46          | 39.59         | 68.86         |
| A9          | 2.41          | 13.41         | 86.79         | 0.42          | 46.41         | 70.41         |
| A10         | 0.7395        | 10.44         | 43.60         | 0.40          | 49.79         | 62.69         |
| Average (A) | 0.554         | 8.613         | 43.530        | 0.349         | 33.830        | 56.616        |
| B1          | 0.04          | 9.55          | 29.10         | 0.22          | 18.20         | 53.33         |
| B2          | 0.09          | 6.13          | 20.12         | 0.19          | 22.16         | 45.66         |
| B3          | 0.14          | 6.29          | 28.99         | 0.22          | 25.66         | 48.78         |
| B4          | 0.08          | 6.11          | 25.17         | 0.26          | 26.11         | 49.48         |
| B5          | 0.12          | 6.17          | 25.11         | 0.24          | 27.17         | 48.78         |
| B6          | 0.20          | 7.33          | 27.71         | 0.23          | 29.9          | 49.48         |
| B7          | 0.16          | 7.13          | 30.47         | 0.28          | 29.99         | 51.65         |
| B8          | 1.51          | 10.25         | 34.55         | 0.28          | 32.23         | 52.46         |
| B9          | 2.00          | 10.14         | 38.78         | 0.29          | 30.19         | 62.33         |
| B10         | 1.22          | 10.59         | 36.19         | 0.30          | 31.89         | 61.06         |
| Average (B) | 0.554         | 7.969         | 29.619        | 0.251         | 27.350        | 52.301        |
| B.v.        | 0.014         | 7.400         | 29.060        | 0.055         | 21.290        | 56.880        |

**Abbreviation:** Background values (B.v.)

**Table S4 Correlation analysis of soil quality variables and the altitude**

|           | AWCD1 | Shannon1 | McIntosh1 | Simpson1 | pH1  | Ec1   | AK1   | OM1    | AN1   | AP1   | TN1    | Hg1   | As1    | Pb1   | Cd1    | Cu1    | Cr1    | Al.    |
|-----------|-------|----------|-----------|----------|------|-------|-------|--------|-------|-------|--------|-------|--------|-------|--------|--------|--------|--------|
| AWCD1     | 1     | .809**   | .874**    | .879**   | .322 | -.261 | .314  | -.036  | .026  | .191  | .061   | -.191 | -.360  | -.536 | -.229  | -.150  | -.344  | -.075  |
| Shannon1  |       | 1        | .903**    | .985**   | .334 | -.371 | .350  | -.150  | .490  | .169  | .464   | -.118 | -.385  | -.314 | .130   | .219   | -.132  | .098   |
| McIntosh1 |       |          | 1         | .949**   | .538 | -.048 | .415  | .053   | .367  | .106  | .420   | -.051 | -.280  | -.420 | .002   | .106   | -.057  | .109   |
| Simpson1  |       |          |           | 1        | .390 | -.275 | .418  | -.091  | .390  | .192  | .408   | -.119 | -.361  | -.400 | .033   | .160   | -.137  | .091   |
| pH1       |       |          |           |          | 1    | .450  | .410  | -.035  | .099  | .444  | .315   | .279  | .252   | -.057 | .192   | .474   | .476   | .597   |
| Ec1       |       |          |           |          |      | 1     | .366  | .349   | -.135 | -.123 | .052   | .348  | .551   | -.078 | -.163  | .142   | .605   | .359   |
| AK1       |       |          |           |          |      |       | 1     | .046   | .077  | .174  | .441   | .469  | .421   | -.058 | .057   | .416   | .538   | .527   |
| OM1       |       |          |           |          |      |       |       | 1      | -.190 | -.144 | -.107  | -.357 | -.319  | -.554 | -.435  | -.646* | -.243  | -.581  |
| AN1       |       |          |           |          |      |       |       |        | 1     | -.435 | .882** | .383  | .054   | .400  | .470   | .480   | .359   | .323   |
| AP1       |       |          |           |          |      |       |       |        |       | 1     | -.236  | -.363 | -.269  | -.287 | -.121  | .162   | -.153  | .108   |
| TN1       |       |          |           |          |      |       |       |        |       |       | 1      | .566  | .228   | .426  | .432   | .580   | .551   | .507   |
| Hg1       |       |          |           |          |      |       |       |        |       |       |        | 1     | .901** | .740* | .486   | .639*  | .859** | .812** |
| As1       |       |          |           |          |      |       |       |        |       |       |        |       | 1      | .633* | .390   | .582   | .877** | .788** |
| Pb1       |       |          |           |          |      |       |       |        |       |       |        |       |        | 1     | .707*  | .613   | .589   | .580   |
| Cd1       |       |          |           |          |      |       |       |        |       |       |        |       |        |       | 1      | .712*  | .518   | .530   |
| Cu1       |       |          |           |          |      |       |       |        |       |       |        |       |        |       |        | 1      | .793** | .912** |
| Cr1       |       |          |           |          |      |       |       |        |       |       |        |       |        |       |        |        | 1      | .888** |
|           | AWCD2 | Shannon2 | McIntosh2 | Simpson2 | pH2  | EC2   | AK2   | OM2    | AN2   | AP2   | TN2    | Hg2   | As2    | Pb2   | Cd2    | Cu2    | Cr2    | Al.    |
| AWCD2     | 1     | .812**   | .900**    | .780**   | .376 | .404  | .526  | -.235  | .399  | .494  | .488   | .342  | .021   | .183  | .428   | .581   | .040   | .326   |
| Shannon2  |       | 1        | .942**    | .838**   | .311 | .187  | .364  | -.363  | .477  | .251  | .613   | .507  | -.049  | .257  | .382   | .595   | .127   | .432   |
| McIntosh2 |       |          | 1         | .933**   | .474 | .196  | .500  | -.306  | .562  | .419  | .689*  | .422  | -.081  | .240  | .489   | .709*  | .065   | .438   |
| Simpson2  |       |          |           | 1        | .556 | .112  | .486  | -.338  | .506  | .451  | .748*  | .350  | -.152  | .196  | .579   | .721*  | .085   | .482   |
| pH2       |       |          |           |          | 1    | .503  | .711* | -.507  | .572  | .574  | .783** | .510  | .432   | .755* | .890** | .772** | .579   | .727*  |
| EC2       |       |          |           |          |      | 1     | .595  | -.698* | .034  | .280  | .252   | .689* | .824** | .725* | .604   | .433   | .712*  | .618   |

[illegible]
